# Supplementary material for: Nonlinear Fitness Consequences of Variation in Expression Level of a Eukaryotic Gene
Source: PubMed Central journal article supplement — Mol Biol Evol. 2012 Oct 27;30(2):448–56. doi: 10.1093/molbev/mss248 (PMC3548308; doi:10.1093/molbev/mss248), 2012-10-27
Supplement: supp_mss248_TableS1.pdf [file supp_mss248_TableS1.pdf]

**Table S1. Sphingolipid responses to alterations in level of *LCB2* expression in strain *Tet07-LCB2*.** Measured sphingolipid levels are based on nine biological replicates.

| Sphingolipid                      | pmole / nmole cellular phosphate<br>mean (standard error) |                          |                            | two-tailed <i>t</i> -test<br><i>p</i> -value |                            |
|-----------------------------------|-----------------------------------------------------------|--------------------------|----------------------------|----------------------------------------------|----------------------------|
|                                   | Low (-2.7x)<br><i>LCB2</i>                                | Wild-type<br><i>LCB2</i> | High (7.3x)<br><i>LCB2</i> | WT vs.<br>Low <i>LCB2</i>                    | WT vs.<br>High <i>LCB2</i> |
| C14-Ceramide                      | 0.008<br>(0.0028)                                         | 0.0038<br>(4e-04)        | 0.0043<br>(0.001)          | 0.211                                        | 0.6602                     |
| C18:1-Ceramide                    | 0.0018<br>(0.0014)                                        | 7e-04<br>(6e-04)         | 4e-04<br>(1e-04)           | 0.5835                                       | 0.6815                     |
| C18-Ceramide                      | 0.022<br>(0.0036)                                         | 0.0149<br>(0.0045)       | 0.0364<br>(0.0102)         | 0.2347                                       | 0.0794                     |
| C20:1-Ceramide                    | 0.0014<br>(2e-04)                                         | 8e-04<br>(2e-04)         | 0.0036<br>(0.0012)         | <b>0.0377</b>                                | 0.0555                     |
| C20-Ceramide                      | 0.0499<br>(0.0079)                                        | 0.0299<br>(0.0078)       | 0.056<br>(0.0175)          | 0.0912                                       | 0.2008                     |
| C22:1-Ceramide                    | 5e-04<br>(1e-04)                                          | 0.0012<br>(8e-04)        | 3e-04<br>(1e-04)           | 0.425                                        | 0.3275                     |
| C22-Ceramide                      | 0.005<br>(0.0014)                                         | 0.0032<br>(7e-04)        | 0.0035<br>(8e-04)          | 0.2953                                       | 0.7994                     |
| C24:1-Ceramide                    | 0.0027<br>(0.0013)                                        | 0.0016<br>(7e-04)        | 6e-04<br>(2e-04)           | 0.4849                                       | 0.2892                     |
| C26-Ceramide                      | 0.0056<br>(0.0048)                                        | 0.0012<br>(2e-04)        | 0.0013<br>(2e-04)          | 0.3878                                       | 0.5976                     |
| C12-Dihydroceramide               | 8e-04<br>(1e-04)                                          | 0.0012<br>(4e-04)        | 0.0024<br>(0.001)          | 0.3258                                       | 0.2855                     |
| C14-Dihydroceramide               | 6e-04<br>(1e-04)                                          | 9e-04<br>(3e-04)         | 0.0017<br>(6e-04)          | 0.5476                                       | 0.206                      |
| C16-Dihydroceramide               | 0.0033<br>(6e-04)                                         | 0.0023<br>(5e-04)        | 0.0044<br>(0.0013)         | 0.2062                                       | 0.1654                     |
| C18:1-Dihydroceramide             | 1e-04<br>(0)                                              | 2e-04<br>(0)             | 2e-04<br>(1e-04)           | <b>0.0216</b>                                | 0.7953                     |
| C18-Dihydroceramide               | 0.0329<br>(0.0046)                                        | 0.0197<br>(0.0034)       | 0.0372<br>(0.009)          | <b>0.037</b>                                 | 0.0964                     |
| C20:1-Dihydroceramide             | 3e-04<br>(1e-04)                                          | 3e-04<br>(1e-04)         | 3e-04<br>(0)               | 0.9694                                       | 0.9616                     |
| C20-Dihydroceramide               | 0.047<br>(0.0071)                                         | 0.0281<br>(0.0047)       | 0.0648<br>(0.0191)         | <b>0.0438</b>                                | 0.0997                     |
| C22:1-Dihydroceramide             | 0.0044<br>(7e-04)                                         | 0.002<br>(4e-04)         | 0.0063<br>(0.0022)         | <b>0.0113</b>                                | 0.0954                     |
| C22-Dihydroceramide               | 0.0978<br>(0.026)                                         | 0.0724<br>(0.0191)       | 0.046<br>(0.0169)          | 0.4438                                       | 0.3146                     |
| C26:1-Dihydroceramide             | 6e-04<br>(4e-04)                                          | 3e-04<br>(1e-04)         | 8e-04<br>(3e-04)           | 0.5239                                       | 0.2028                     |
| C26-Dihydroceramide               | 0.027<br>(0.0077)                                         | 0.0117<br>(0.0015)       | 0.1124<br>(0.0536)         | 0.0859                                       | 0.0974                     |
| Dihydrosphingosine                | 1.5245<br>(0.1698)                                        | 1.1986<br>(0.1592)       | 1.0618<br>(0.2145)         | 0.1807                                       | 0.616                      |
| Dihydrosphingosine<br>1-Phosphate | 0.3682<br>(0.0731)                                        | 0.4646<br>(0.1227)       | 0.2382<br>(0.0976)         | 0.5113                                       | 0.1689                     |
| Sphingosine 1-Phosphate           | 0.0024<br>(0.002)                                         | 0.0011<br>(5e-04)        | 5e-04<br>(3e-04)           | 0.5908                                       | 0.2583                     |
