# Supplementary material for: Nonlinear Fitness Consequences of Variation in Expression Level of a Eukaryotic Gene
Source: PubMed Central journal article supplement — Mol Biol Evol. 2012 Oct 27;30(2):448–56. doi: 10.1093/molbev/mss248 (PMC3548308; doi:10.1093/molbev/mss248), 2012-10-27
Supplement: supp_mss248_TableS2.pdf [file supp_mss248_TableS2.pdf]

**Table S2. Overrepresented ( $P < 0.01$ ) gene ontology classes among genes with expression changes in response to reduced *LCB2* expression.**

| Fold change in expression of measured gene | n   | GO Process                                                                                                                                                                                                                                                                                                            | GO Function                                                                                                                                                                                                                                                                                                                                                                                                                                                                                             | GO Component                                                                                                                                                                                                                 |
|--------------------------------------------|-----|-----------------------------------------------------------------------------------------------------------------------------------------------------------------------------------------------------------------------------------------------------------------------------------------------------------------------|---------------------------------------------------------------------------------------------------------------------------------------------------------------------------------------------------------------------------------------------------------------------------------------------------------------------------------------------------------------------------------------------------------------------------------------------------------------------------------------------------------|------------------------------------------------------------------------------------------------------------------------------------------------------------------------------------------------------------------------------|
| >1.5                                       | 784 | Reproduction<br>Response to oxidative stress<br>Viral reproduction<br>Transposition, RNA-mediated<br>Developmental process<br>Transposition<br>Viral procapsid maturation<br>DNA integration<br>Oxidation-reduction process<br>Monosaccharide catabolic process<br>Response to chemical stimulus<br>DNA recombination | Catalytic activity<br>Aspartic-type endopeptidase activity<br>Structural constituent of cell wall<br>Antioxidant activity<br>RNA-directed DNA polymerase activity<br>Alditol:NADP+ 1-oxidoreductase activity<br>Oxidoreductase activity<br>Ribonuclease H activity<br>Peptidase activity<br>Hydrolase activity, acting on ester bonds<br>Ribonuclease activity<br>Endonuclease activity, active with either ribo- or deoxyribonucleic acids and producing 5'-phosphomonoesters<br>Endonuclease activity | Retrotransposon nucleocapsid<br>Fungal-type cell wall<br>External encapsulating structure                                                                                                                                    |
| >2                                         | 303 | Response to oxidative stress<br>Arabinose catabolic process<br>Response to stress                                                                                                                                                                                                                                     | Alditol:NADP+ 1-oxidoreductase activity                                                                                                                                                                                                                                                                                                                                                                                                                                                                 | Retrotransposon nucleocapsid                                                                                                                                                                                                 |
| >3                                         | 81  | Response to copper ion                                                                                                                                                                                                                                                                                                | Cadmium ion binding                                                                                                                                                                                                                                                                                                                                                                                                                                                                                     | Fungal-type cell wall                                                                                                                                                                                                        |
| <-1.5                                      | 524 | -                                                                                                                                                                                                                                                                                                                     | Structural constituent of ribosome<br>Structural molecule activity                                                                                                                                                                                                                                                                                                                                                                                                                                      | Ribosome<br>Organelle<br>Fungal-type cell wall<br>Non-membrane-bounded organelle<br>Intracellular organelle<br>Ribonucleoprotein complex<br>External encapsulating structure<br>Intracellular non-membrane-bounded organelle |
| <-2                                        | 121 | -                                                                                                                                                                                                                                                                                                                     | -                                                                                                                                                                                                                                                                                                                                                                                                                                                                                                       | -                                                                                                                                                                                                                            |
| <-3                                        | 25  | -                                                                                                                                                                                                                                                                                                                     | -                                                                                                                                                                                                                                                                                                                                                                                                                                                                                                       | -                                                                                                                                                                                                                            |

Genome-wide expression data is from microarray analysis in Mnainemeh *et al.* 2004, where *LCB2* expression was reduced in strain *Tet07-LCB2* with 10 µg/ml of doxycycline. GO overrepresentation among responsive genes was calculated using the Generic Gene Ontology Term Finder ([go.princeton.edu](http://go.princeton.edu)), and redundant GO terms were removed ([revigo.irb.hr](http://revigo.irb.hr)).
